# Supplementary material for: A fluorescent aptasensor for ATP based on functional DNAzyme/walker and terminal deoxynucleotidyl transferase-assisted formation of DNA-AgNCs
Source: Royal Society of Chemistry journal article supplement (doi:10.1039/d2an02006h), 2023-01-01
Supplement: d2an02006h1.pdf [file d2an02006h1.pdf]

Supplementary Information

**Fluorescent aptasensor for ATP based on functional  
DNAzyme/walker and terminal deoxynucleotidyl transfease-assisted  
formation of DNA-AgNCs**

Shixin Cai, Xin Chen, Haohan Chen, Yuting Zhang, Xiaoli Wang, Nandi Zhou\*

The Key Laboratory of Carbohydrate Chemistry and Biotechnology, Ministry of Education, School of

Biotechnology, Jiangnan University, Wuxi 214122, China

\*Corresponding author. E-mail: zhounandi@jiangnan.edu.cn

## SI-1 Sequences and Instruments

### SI-1.1. sequences

S1: HS-5'-TTTTTTTTTTTTTCACTATrAGGAAGAGA-3'

S2: 5'-TGCGGAGGAAGGTTTTTTTTTTTTTT-3'-SH

S3: 5'-ACCTGGGGGAGTA(T)<sub>46</sub>GTCTCTTCTCCGAGCCGGTCGAAATAGT-3'

### SI-1.2. Instruments

A UV-Vis spectrophotometer was used to scan the complete wavelength of the ultraviolet absorption spectrum of nanomaterials (Hitachi, U-3900). By using a Nanoparticle Size and Zeta Potential Analyzer, hydration particle sizes (DLS) and zeta potentials were assessed (British Malvern Instruments Co., Ltd., ZEN3700). Transmission electron microscopy (TEM) was used to characterize the morphologies of nanomaterials (Japan Electronics Co., Ltd., JEM-2100). The BioTek microplate reader was used to determine fluorescence. The X-ray diffraction method was used to characterize qualitative investigation of material composition (XRD, D8, AXS, Germany). Gel images were captured using a C300 system (Azure Biosystems, USA).

**Table S1.** Comparison of the performance of the aptasensor in this work and the relevant methods in the references for ATP detection.

| Detection Method         | LOD (nM)        | Detection range (nM)  | Reference |
|--------------------------|-----------------|-----------------------|-----------|
| Electrochemiluminescence | 0.17            | $0.5-2.5 \times 10^3$ | 1         |
| SERS                     | 0.4             | $1-2 \times 10^2$     | 2         |
| Colorimetry              | $1 \times 10^2$ | $0-5 \times 10^3$     | 3         |
| Electrochemical          | 0.05            | $0.1-1 \times 10^6$   | 4         |
| Fluorescent              | 1.01            | $3-2.5 \times 10^3$   | 5         |
| Fluorescent              | 0.27            | $5-1 \times 10^4$     | This work |

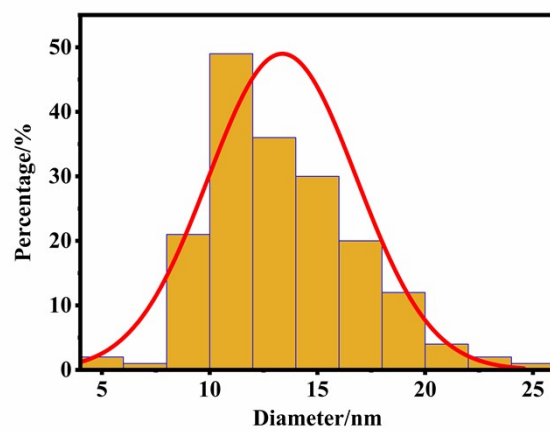

**Fig. S1.** The particle size distribution of Fe<sub>3</sub>O<sub>4</sub>@Au.

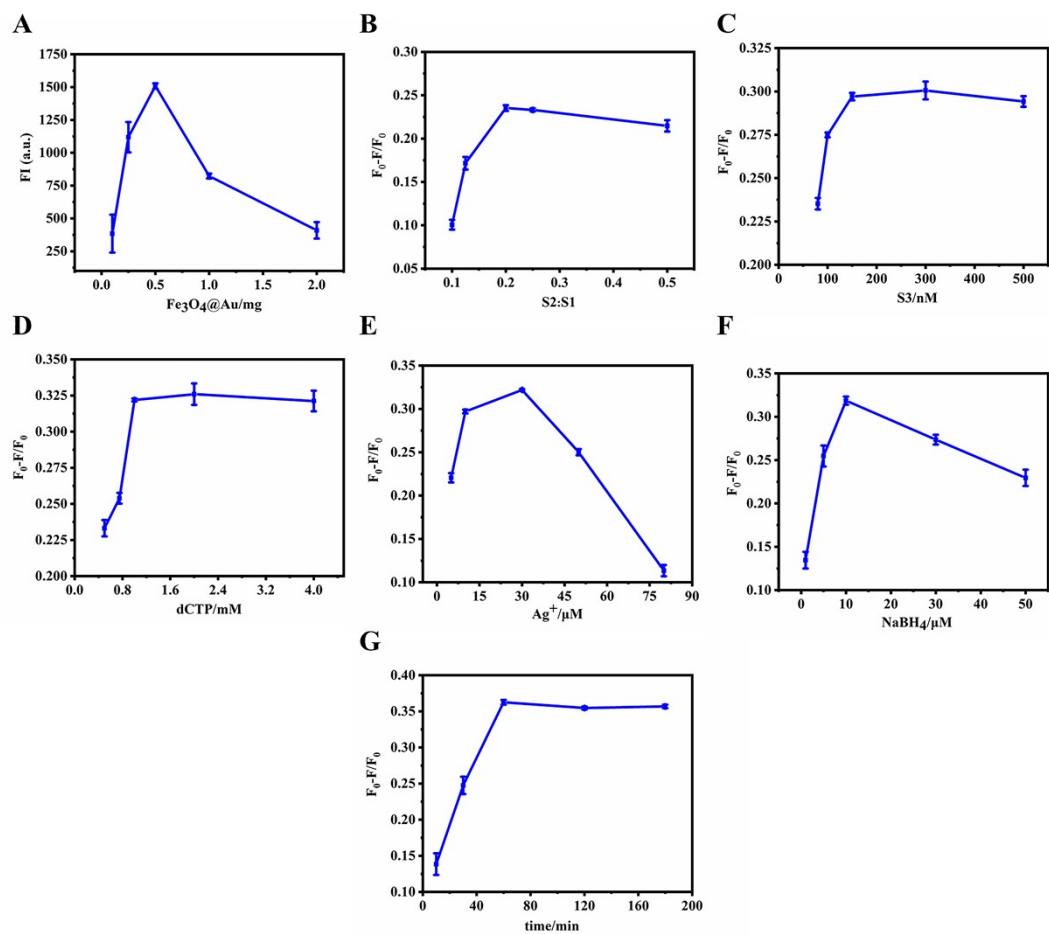

**Fig. S2.** Optimization of the experimental conditions. (A) The amount of Fe<sub>3</sub>O<sub>4</sub>@Au, (B) the ratio of S1 to S2, (C) the concentration of S3, (D) the dosage of dCTP, (E) the dosage of Ag<sup>+</sup>, (F) the dosage of NaBH<sub>4</sub>, and (G) the incubation time.

## Reference

1. J. Li, X. Wang, W. Liu, X. Li, L. Yang, H. Ma, R. Wu and Q. Wei, *Sens. Actuators, B*, 2021, **346**,130581.
2. C. Wu, S. Wang, X. Luo, R. Yuan and X. Yang, *Chem. Commun.*, 2020, **56**, 1413-1416.
3. Y. Mao, T. Fan, R. Gysbers, Y. Tan, F. Liu, S. Lin and Y. Jiang, *Talanta*, 2017, **168**, 279-285.
4. Y. Jiang, W. Ma, W. Ji, H. Wei and L. Mao, *Analyst*, 2019, **144**, 1711-1717.
5. Y. L. Fan, Z. Y. Liu, Y. M. Zeng, L. Y. Huang, Z. Li, Z. L. Zhang, D. W. Pang and Z. Q. Tian, *Talanta*, 2021, **223**, 121721.
